# Supplementary material for: Porcine Circovirus 3 Detection in Aborted Fetuses and Stillborn Piglets from Swine Reproductive Failure Cases
Source: PubMed Central journal article supplement (PMC7915229; doi:10.3390/v13020264), 2021-02-09
Supplement: viruses-13-00264-s001.pdf [file viruses-13-00264-s001.pdf]

**Supplementary Table S1.** Number of fetuses or stillborn piglets, range of crown-to-rump length (CRL) and RT-qPCR or qPCR results obtained in those cases positive at least for one virus.

| Case No. | Number of fetuses | CRL (cm) range | PCV-3 Ct values (log <sub>10</sub> copies/ $\mu$ L) | PCV-2 Ct values (log <sub>10</sub> copies/mL) | PRRSV Ct values |
|----------|-------------------|----------------|-----------------------------------------------------|-----------------------------------------------|-----------------|
| 2        | 5                 | 22-30          | Neg                                                 | 37.0 (BLQ)                                    | Neg             |
| 3        | 1                 | 22             | 24.4 (3.5)                                          | Neg                                           | Neg             |
| 4        | 2                 | 22-28          | 35.6 (BLQ)                                          | Neg                                           | Neg             |
| 6        | 1                 | 23             | Neg                                                 | Neg                                           | 32.9            |
| 9        | 1                 | 30             | 37.7 (BLQ)                                          | Neg                                           | Neg             |
| 13       | 3                 | 23             | 37.5 (BLQ)                                          | Neg                                           | Neg             |
| 14       | 13                | 20-28          | Neg                                                 | Neg                                           | 24.91           |
| 17       | 8                 | 26-32          | 37.4 (BLQ)                                          | Neg                                           | Neg             |
| 22       | 2                 | 16-21          | Neg                                                 | 35.5 (BLQ)                                    | Neg             |
| 24       | 5                 | 23             | 38.2 (BLQ)                                          | Neg                                           | Neg             |
| 30       | 2                 | 22-25          | Neg                                                 | 38.4 (BLQ)                                    | Neg             |
| 32       | 6                 | 25-28          | 37.4 (BLQ)                                          | Neg                                           | Neg             |
| 35       | 5                 | 15-20          | 24.3 (4.7)                                          | Neg                                           | Neg             |
| 36       | 4                 | 6-22           | 24.3 (3.5)                                          | 37.2 (BLQ)                                    | 32.7            |
| 39       | 11                | 15-25          | 26.5 (2.9)                                          | Neg                                           | Neg             |
| 40       | 3                 | 16-23          | 18.0 (5.5)                                          | Neg                                           | Neg             |
| 41       | 2                 | 22-25          | Neg                                                 | 38.3 (BLQ)                                    | Neg             |
| 42       | 10                | 23-27          | 33.8 (0.6)                                          | Neg                                           | 27.1            |
| 43       | 2                 | 22             | 35.5 (BLQ)                                          | Neg                                           | Neg             |
| 44       | 10                | 17-23          | 36.5 (BLQ)                                          | Neg                                           | Neg             |
| 47       | 6                 | 23-27          | 34.7 (0.30)                                         | Neg                                           | Neg             |
| 48       | 2                 | 23             | 37.9 (BLQ)                                          | Neg                                           | Neg             |
| 49       | 2                 | 15             | 37.8 (BLQ)                                          | Neg                                           | Neg             |
| 52       | 6                 | 27-28          | 16.9 (5.71)                                         | Neg                                           | Neg             |

**BLQ: Below the quantification limit**

Tree scale: 0.1

Tentative PCV-3b

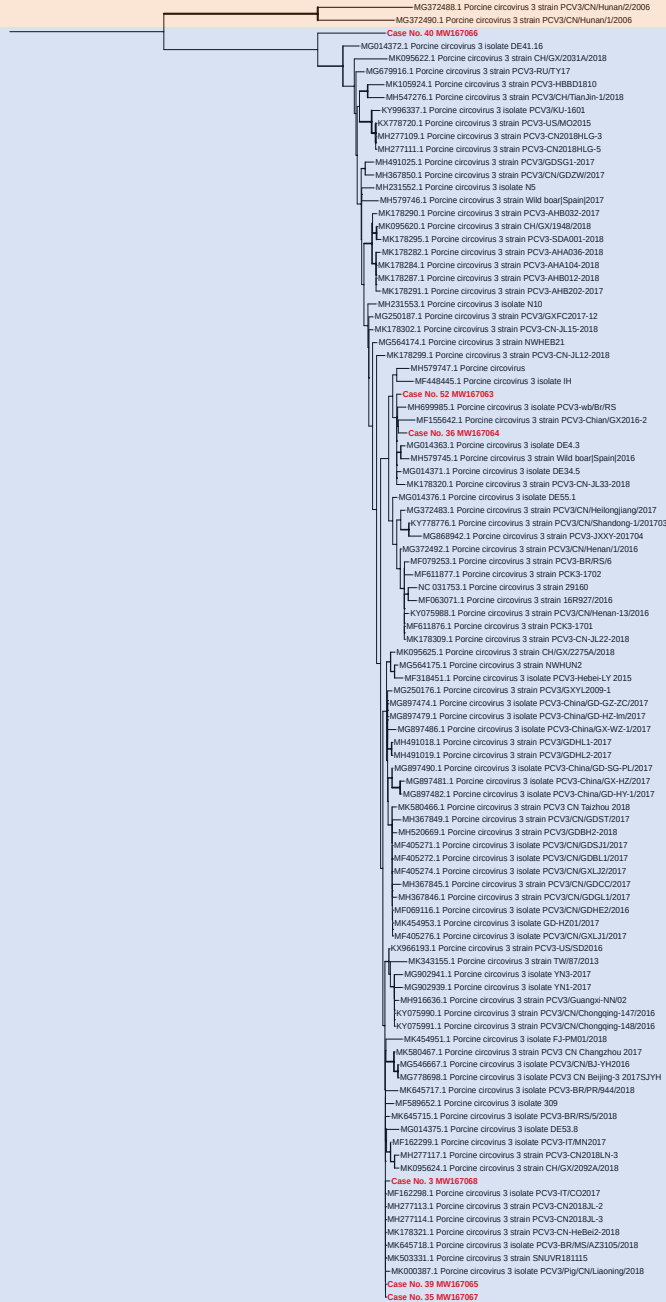

PCV-3a

Tree scale: 0.1

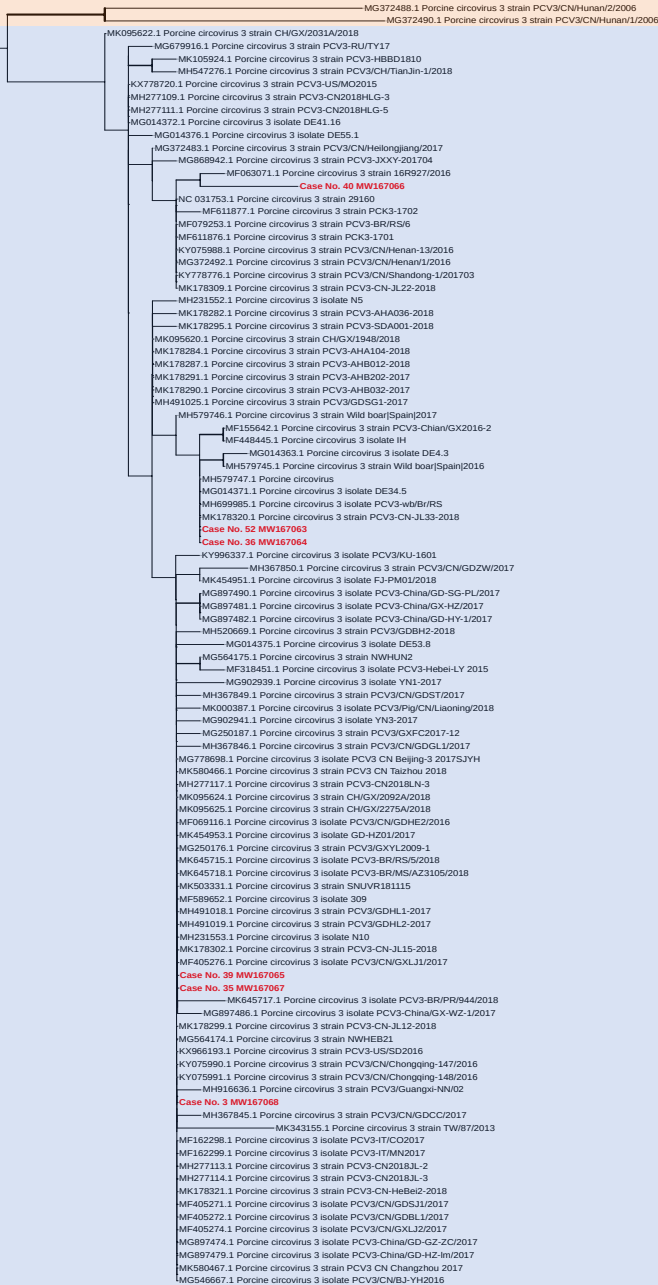

Tentative PCV-3b

PCV-3a
